# Supplementary material for: Clinical Outcome Data of Children Treated with Cannabis-Based Medicinal Products for Treatment Resistant Epilepsy—Analysis from the UK Medical Cannabis Registry
Source: PubMed Central journal article supplement (PMC10166640; doi:10.1055/a-2002-2119), 2023-01-30
Supplement: 10-1055-a-2002-2119-s1020223339oa.pdf [file 10-1055-a-2002-2119-s1020223339oa.pdf]

**Supplementary Table S1** Maximum tolerated mean daily dose for each therapy

|                                     | CBD Isolate<br>(n = 19) | CBD Broad Spectrum<br>(n = 17) | CBD & Δ <sup>9</sup> -THC<br>(n = 17) |
|-------------------------------------|-------------------------|--------------------------------|---------------------------------------|
| Cannabidiol dose (mg/kg/d)          | 14.1 ± 5.3              | 5.7 ± 4.1                      | 8.7 ± 4.3                             |
| Tetrahydrocannabinol dose (mg/kg/d) | N/A                     | N/A                            | 0.4 ± 0.3                             |

Abbreviations: CBD, cannabidiol; Δ<sup>9</sup>-THC, delta-9-tetrahydrocannabinol.

Note: Data displayed as mean ± standard deviation.

**Supplementary Table S2** Number of prescriptions per individual CBMP

| Prescription data                                                     | Number of prescriptions | CBD dose    | Δ <sup>9</sup> -THC dose |
|-----------------------------------------------------------------------|-------------------------|-------------|--------------------------|
| Adven 100 mg CBD/5 mg full spectrum Δ <sup>9</sup> -THC/mL oil        | 5                       | 100 mg/mL   | 5 mg/mL                  |
| Adven 150 mg/mL CBD isolate oil                                       | 3                       | 150 mg/mL   | 0 mg/mL                  |
| Adven 20 mg/mL Δ <sup>9</sup> -THC full spectrum oil                  | 2                       | 20 mg/mL    | 0 mg/mL                  |
| Adven 50 mg/mL CBD broad spectrum oil                                 | 21                      | 50 mg/mL    | 0 mg/mL                  |
| Bedica <1% CBD/2% Δ <sup>9</sup> -THC oil                             | 4                       | <10 mg/mL   | 20 mg/mL                 |
| Bedrolite 10% CBD/< 1% Δ <sup>9</sup> -THC                            | 6                       | 100 mg/mL   | <10 mg/mL                |
| Epidyolex/CBD isolate 100 mg/mL oil                                   | 1                       | 100 mg/mL   | 0 mg/mL                  |
| NOIDECS C20, Celixir 20 186.4 mg CBD/9 mg Δ <sup>9</sup> -THC /mL oil | 5                       | 186.4 mg/mL | 9 mg/mL                  |

**Supplementary Table S3** Comparison of mean difference in Impact of Pediatric Epilepsy Score at each follow-up between those previously naïve to treatment and those who had previously commenced treatment

| Follow-up Month | Previously naïve to treatment | Commenced treatment prior to enrollment | p-Value |
|-----------------|-------------------------------|-----------------------------------------|---------|
| Month 1         | -1.9 ± 3.5                    | -0.9 ± 4.7                              | 0.605   |
| Month 3         | -0.9 ± 6.5                    | -1.2 ± 9.8                              | 0.962   |
| Month 6         | -6.7 ± 5.0                    | -1.3 ± 6.8                              | 0.233   |

**Supplementary Table S4** Comparison of mean difference in Impact of Pediatric Epilepsy Score at each follow-up according to maximally tolerated therapy

| Follow-up month | Mean difference<br>CBD isolate | Mean difference<br>CBD whole spectrum | Mean difference CBD and | p-Value |
|-----------------|--------------------------------|---------------------------------------|-------------------------|---------|
| Month 1         | -3.9 ± 3.8                     | -4.5 ± 8.0                            | 0.1 ± 4.5               | 0.280   |
| Month 3         | 4.2 ± 2.4                      | -2.8 ± 5.6                            | -1.7 ± 10.8             | 0.648   |
| Month 6         | -7.4 ± 7.5                     | -5.1 ± 5.5                            | -1.7 ± 6.9              | 0.598   |

**Supplementary Table S5** Adverse events reported by participants prescribed CBD and Δ<sup>9</sup>-THC CBMPs (n = 17)

| Adverse events              | Mild      | Moderate  | Severe    | Debilitating/Life threatening | Total      |
|-----------------------------|-----------|-----------|-----------|-------------------------------|------------|
| Fatigue                     | 5         | 2         | 0         | 0                             | 7 (41.1%)  |
| Seizure frequency increased | 0         | 1         | 0         | 0                             | 1 (5.9%)   |
| Sepsis                      | 0         | 0         | 0         | 1                             | 1 (5.9%)   |
| Somnolence                  | 0         | 1         | 0         | 0                             | 1 (5.9%)   |
| Weight loss                 | 0         | 0         | 1         | 0                             | 1 (5.9%)   |
| Total                       | 5 (29.4%) | 4 (23.5%) | 2 (11.8%) | 1 (5.9%)                      | 11 (64.7%) |
